# Supplementary material
Source: publisher figshare collection journal article supplement (https://frontiersin.figshare.com/ndownloader/files/22538210)
Supplement: Supplementary file 1 [file 22538210]

Table S3. General linear mixed models presented in Figure 3, for regions: Transpolar Drift (T), North of Svalbard (N) and Siberian Shelf-Slope (S), and ice types: First-year ice (FYI) and multiyear ice (MYI), as well as both (All). Models use individual ice cores (id) as random intercept. Bold indicates significant at *p*<0.05.

| **Region** | | | | | | |
| --- | --- | --- | --- | --- | --- | --- |
|  | FYI | | | MYI | | |
| *Predictors* | *Log-Mean* | *CI* | *p* | *Log-Mean* | *CI* | *p* |
| (Intercept) | 1.90 | 1.19 – 2.61 | **<0.001** | 2.82 | 2.67 – 2.96 | **<0.001** |
| region: T | 0.30 | -0.50 – 1.09 | 0.463 | -0.37 | -0.60 – -0.13 | **0.002** |
| region: N | 0.60 | -0.12 – 1.32 | 0.102 | 0.35 | 0.11 – 0.60 | **0.005** |
| region: S |  |  |  | 0.05 | -0.19 – 0.29 | 0.685 |
| N | 117 id | | | 98 id | | |
| Observations | 117 | | | 98 | | |

| **Dataset** | | | | | | |
| --- | --- | --- | --- | --- | --- | --- |
|  | FYI | | | MYI | | |
| *Predictors* | *Log-Mean* | *CI* | *p* | *Log-Mean* | *CI* | *p* |
| (Intercept) | 2.13 | 1.82 – 2.45 | **<0.001** | 2.72 | 2.62 – 2.83 | **<0.001** |
| dataset: ICE | 0.44 | -0.15 – 1.04 | 0.144 |  |  |  |
| dataset: N-ICE | 0.36 | 0.02 – 0.70 | **0.038** | 0.44 | 0.21 – 0.68 | **<0.001** |
| N | 117 id | | | 98 id | | |
| Observations | 117 | | | 98 | | |

| **Decade** | | | | | | |
| --- | --- | --- | --- | --- | --- | --- |
|  | FYI | | | MYI | | |
| *Predictors* | *Log-Mean* | *CI* | *p* | *Log-Mean* | *CI* | *p* |
| (Intercept) | 1.90 | 1.18 – 2.61 | **<0.001** | 2.95 | 2.81 – 3.08 | **<0.001** |
| decade: 00s | 0.37 | -0.44 – 1.19 | 0.370 | -0.66 | -0.93 – -0.39 | **<0.001** |
| decade: 10s | 0.59 | -0.14 – 1.31 | 0.111 | 0.09 | -0.13 – 0.31 | 0.403 |
| decade: 90s |  |  |  | -0.28 | -0.50 – -0.06 | **0.012** |
| N | 117 id | | | 98 id | | |
| Observations | 117 | | | 98 | | |

| **Ice type** | | | |
| --- | --- | --- | --- |
|  | All | | |
| *Predictors* | *Log-Mean* | *CI* | *p* |
| (Intercept) | 2.46 | 2.36 – 2.56 | **<0.001** |
| ice.type: MYI | 0.33 | 0.18 – 0.47 | **<0.001** |
| N id | 215 | | |
| Observations | 215 | | |
